# Supplementary material for: A Circular RNA Derived from the Pumilio 1 Gene Could Regulate PTEN in Human Cumulus Cells
Source: MDPI journal article supplement (doi:10.3390/genes15010124), 2024-01-19

# Supplementary data

**Figure S1.** Amplification plot of the selected circRNAs (A). Report of Melting curve plot (B). Electrophoretic analysis of the circRNA products obtained by Real Time PCR amplification (C).

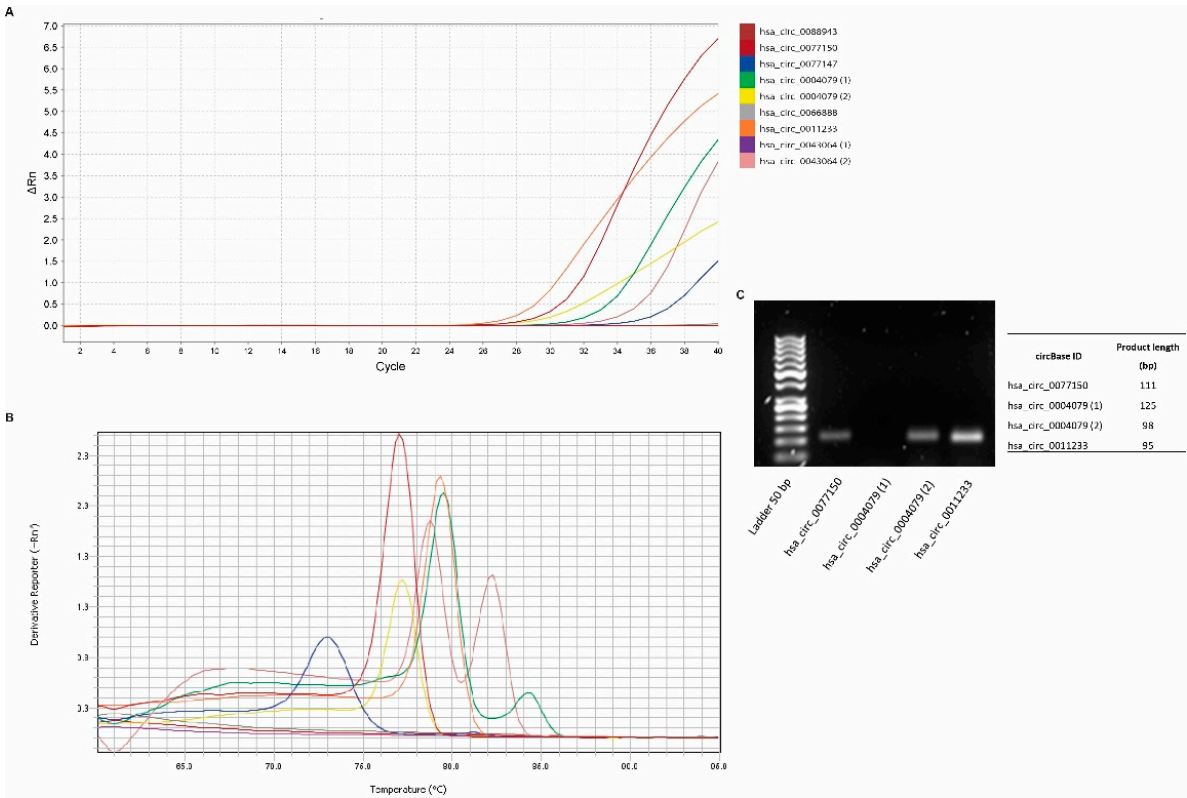

**Figure S2.** Representative illustration of PUM1 pre-mRNA and circular transcript (circPUM1) derived from back-splicing 15th, 16th and 17th exons.

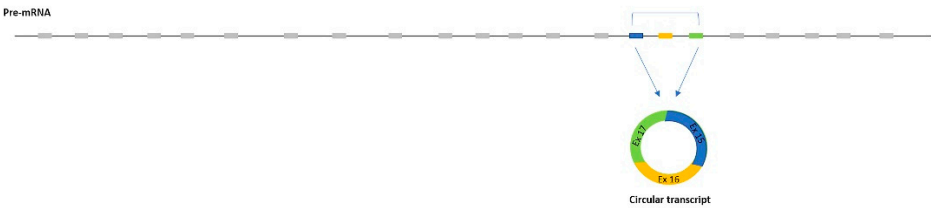

Supplement: s1 [file s1]
